# Supplementary material
Source: PubMed Central journal article supplement (PMC6314478)
Supplement: NIHMS1511581-supplement-Figures_S1-S6__Table_S1-S5.pdf [file NIHMS1511581-supplement-Figures_S1-S6__Table_S1-S5.pdf]

## Supplementary Tables and Figures

**Supplementary Table 1. Significant clusters within the neural threat-predictive pattern. Related to Figure 2A**

| Region                     | MNI Coordinates |     |     | voxels | mm3  | max stat |
|----------------------------|-----------------|-----|-----|--------|------|----------|
|                            | x               | y   | z   |        |      |          |
| <b>Cortex</b>              |                 |     |     |        |      |          |
| <i>Frontal Lobe</i>        |                 |     |     |        |      |          |
| R Inferior Frontal Gyrus   | 48              | 26  | -18 | 1      | 8    | -3.73    |
| L Middle Frontal Gyrus     | -38             | 52  | -10 | 256    | 2048 | -5.73    |
| R Middle Frontal Gyrus     | 32              | 36  | 46  | 8      | 64   | -3.92    |
| R Superior Frontal Gyrus   | 38              | 48  | 20  | 5      | 40   | -3.90    |
| R Superior Frontal Gyrus   | 40              | 34  | 30  | 18     | 144  | -4.56    |
| L Anterior Cingulate       | -14             | 42  | 6   | 1      | 8    | 3.70     |
| L Cingulate Gyrus          | -4              | 8   | 40  | 1      | 8    | 3.73     |
| <i>Temporal Lobe</i>       |                 |     |     |        |      |          |
| R Insula                   | 42              | -16 | 14  | 4      | 32   | 3.80     |
| L Fusiform Gyrus           | -44             | -54 | -8  | 12     | 96   | 4.17     |
| R Inferior Temporal Gyrus  | 28              | -12 | -42 | 7      | 56   | 3.94     |
|                            | 64              | -14 | -20 | 2      | 16   | -3.84    |
| R Inferior Temporal Gyrus  | 64              | -52 | -18 | 7      | 56   | 4.27     |
| L Middle Temporal Gyrus    | -52             | -68 | 24  | 20     | 160  | -4.13    |
|                            | -62             | -32 | -12 | 2      | 16   | -3.71    |
| R Middle Temporal Gyrus    | 54              | -2  | -8  | 9      | 72   | -4.13    |
|                            | 66              | -26 | -4  | 4      | 32   | -3.81    |
| L Superior Temporal Gyrus  | -50             | -2  | 6   | 1      | 8    | 3.70     |
|                            | -48             | -48 | 10  | 1      | 8    | 3.70     |
| R Parahippocampal Gyrus    | 12              | -16 | -16 | 2      | 16   | 3.96     |
| L Parahippocampal Gyrus    | -24             | -46 | -4  | 4      | 32   | 4.23     |
| R Amygdala                 | 24              | -4  | -6  | 11     | 88   | 4.03     |
| <i>Parietal Lobe</i>       |                 |     |     |        |      |          |
| L Inferior Parietal Lobule | -48             | -66 | 40  | 106    | 848  | -4.85    |
| R Postcentral Gyrus        | 54              | -24 | 22  | 13     | 104  | 4.41     |
| L Precuneus                | -32             | -64 | 36  | 1      | 8    | -3.83    |
| R Precuneus                | 14              | -58 | 42  | 1      | 8    | -3.79    |
| R Superior Parietal Lobule | 14              | -56 | 64  | 47     | 376  | -4.35    |
| <i>Occipital Lobe</i>      |                 |     |     |        |      |          |

|                                      |     |     |     |     |      |      |
|--------------------------------------|-----|-----|-----|-----|------|------|
| R Cuneus                             | 16  | -76 | 10  | 4   | 32   | 4.02 |
| <b>SubCortex</b>                     |     |     |     |     |      |      |
| L Basal Ganglia:Globus Pallidus      | -12 | 0   | -6  | 14  | 112  | 4.36 |
| L Thalamus: Ventral Anterior Nucleus | -8  | -4  | 8   | 7   | 56   | 4.28 |
| <b>Cerebellum</b>                    |     |     |     |     |      |      |
| L Cerebellum, Declive                | -6  | -74 | -18 | 99  | 792  | 5.91 |
|                                      | -8  | -60 | -18 | 32  | 256  | 4.12 |
| <b>B Midbrain</b>                    |     |     |     |     |      |      |
| L Periaqueductal Gray                | -2  | -26 | -6  | 204 | 1632 | 6.04 |
| R Substantia Nigra                   | 12  | -18 | -12 | 3   | 24   | 3.93 |

\* Thresholded (bootstrapped 5,000 samples) and corrected for multiple comparisons (FDR  $p < 0.05$ ,  $k = 1$ )

**Supplementary Table 2. Significant clusters in univariate acquisition (CS+>CS-) map. Related to STAR METHODS QUANTIFICATION AND STATISTICAL ANALYSIS *Univariate Analysis* and Figure S1**

| Region                      | MNI Coordinates |     |     | voxels | mm3  | maxstat |
|-----------------------------|-----------------|-----|-----|--------|------|---------|
|                             | x               | y   | z   |        |      |         |
| <b>Cortex</b>               |                 |     |     |        |      |         |
| <b><i>Frontal Lobe</i></b>  |                 |     |     |        |      |         |
| L Medial Frontal Gyrus      | -10             | 56  | -14 | 75     | 600  | -4.08   |
|                             | -38             | 54  | -8  | 753    | 6024 | -5.01   |
| L Middle Frontal Gyrus      | -42             | 18  | 42  | 51     | 408  | -3.76   |
|                             | -58             | 26  | 28  | 8      | 64   | -3.41   |
| L Premotor Cortex           | -10             | -26 | 46  | 12     | 96   | 3.89    |
| L Orbitofrontal Cortex      | -6              | 42  | -28 | 17     | 136  | -3.6    |
|                             | -4              | 30  | 18  | 63     | 504  | 4.48    |
| L Anterior Cingulate Gyrus  | -2              | 24  | 24  | 356    | 2848 | 4.92    |
|                             | -20             | 22  | 24  | 33     | 264  | 4.37    |
|                             | -4              | 8   | 40  | 427    | 3416 | 6.2     |
| R Middle Frontal Gyrus      | 58              | 44  | -8  | 6      | 48   | -3.38   |
| R Inferior Frontal Gyrus    | 36              | 20  | -6  | 206    | 1648 | 4.2     |
| R Superior Frontal Gyrus    | 20              | 48  | 38  | 6      | 48   | -3.43   |
| R Precentral Gyrus          | 34              | -22 | 48  | 26     | 208  | 3.73    |
|                             | 48              | -12 | 48  | 19     | 152  | 3.43    |
| R Mid Cingulate Gyrus       | 6               | -20 | 28  | 9      | 72   | 3.51    |
| R Anterior Cingulate Gyrus  | 8               | -22 | 44  | 109    | 872  | 4.15    |
|                             | 6               | 2   | 42  | 461    | 3688 | 6.53    |
| <b><i>Temporal Lobe</i></b> |                 |     |     |        |      |         |
| L Middle Temporal Gyrus     | -60             | -30 | -12 | 685    | 5480 | -5.73   |
|                             | -38             | -20 | 16  | 44     | 352  | 3.95    |
|                             | -36             | 10  | 2   | 285    | 2280 | 4.94    |
| L Insula                    | -36             | 0   | -6  | 116    | 928  | 4.1     |
|                             | -30             | 20  | 8   | 417    | 3336 | 6.05    |
|                             | -40             | 0   | 10  | 616    | 4928 | 6.65    |
| L Superior Temporal Gyrus   | -56             | 2   | 6   | 146    | 1168 | 5.48    |
| L Transverse Temporal Gyrus | -52             | -22 | 12  | 290    | 2320 | 5.15    |
| L Fusiform Gyrus            | -40             | -52 | -6  | 14     | 112  | 7.82    |
| R Middle Temporal Gyrus     | 66              | -20 | -18 | 276    | 2208 | -5.29   |
|                             | 58              | -36 | 20  | 119    | 952  | 4.42    |
| R Insula                    | 36              | -22 | 18  | 153    | 1224 | 5.12    |
|                             | 48              | -18 | 16  | 250    | 2000 | 5.24    |

|                                   |     |     |     |      |       |       |
|-----------------------------------|-----|-----|-----|------|-------|-------|
|                                   | 38  | -10 | -2  | 81   | 648   | 4.23  |
|                                   | 36  | -16 | 10  | 104  | 832   | 4.21  |
| R Superior Temporal Gyrus         | 48  | -58 | 28  | 90   | 720   | -4.19 |
|                                   | 56  | -2  | 4   | 61   | 488   | 4.61  |
| R Amygdala                        | 22  | -14 | -8  | 69   | 552   | 4.43  |
| <b>Parietal Lobe</b>              |     |     |     |      |       |       |
|                                   | -46 | -66 | 40  | 1337 | 10696 | -5.98 |
| L Inferior Parietal Lobule        | -56 | -28 | 24  | 627  | 5016  | 6.72  |
|                                   | -50 | -38 | 22  | 123  | 984   | 4.48  |
| L Precuneus                       | 0   | -60 | 36  | 99   | 792   | -3.75 |
|                                   | 56  | -26 | 22  | 303  | 2424  | 6.46  |
| R Inferior Parietal Lobule        | 50  | -32 | 24  | 86   | 688   | 4.62  |
|                                   | 40  | -68 | 52  | 36   | 288   | -3.91 |
| R Superior Parietal Lobule        | 38  | -62 | 34  | 14   | 112   | -3.69 |
| R Angular Gyrus                   |     |     |     |      |       |       |
| <b>Occipital Lobe</b>             |     |     |     |      |       |       |
| L Middle Occipital Gyrus          | -38 | -92 | 14  | 30   | 240   | -4.13 |
| <b>SubCortex</b>                  |     |     |     |      |       |       |
| L Caudate                         | -14 | -12 | 20  | 6    | 48    | 3.37  |
| L Lentiform Nucleus               | -14 | 4   | -6  | 476  | 3808  | 7.82  |
| R Caudate                         | 10  | 10  | 2   | 232  | 1856  | 4.16  |
| R Lentiform Nucleus               | 24  | 2   | -4  | 251  | 2008  | 5.34  |
| R Nucleus Accumbens               | 22  | 12  | -12 | 232  | 1856  | 4.32  |
| R Claustrum                       | 32  | 6   | 8   | 391  | 3128  | 5.72  |
| R Thalamus: Medial Dorsal Nucleus | 6   | -18 | 10  | 83   | 664   | 3.97  |
| <b>Cerebellum</b>                 |     |     |     |      |       |       |
|                                   | -28 | -50 | -28 | 147  | 1176  | 5.01  |
| L Cerebellum, Culmen              | -6  | -56 | -14 | 171  | 1368  | 4.83  |
|                                   | -6  | -70 | -18 | 77   | 616   | 4.39  |
| L Cerebellum, Declive             | 4   | -58 | -28 | 27   | 216   | 3.66  |
| R Cerebellum, Culmen              | 40  | -50 | -32 | 26   | 208   | 3.7   |
|                                   | 2   | -46 | -16 | 5    | 40    | 3.34  |
| R Cerebellum, Anterior Lobe       | 2   | -48 | -12 | 16   | 128   | 3.62  |
| <b>Brainstem</b>                  |     |     |     |      |       |       |
| L Midbrain, Periaqueductal Gray   | -2  | -14 | -12 | 356  | 2848  | 5.41  |
| R Pons                            | 8   | -34 | -42 | 40   | 320   | 4.27  |
| R Midbrain, Substantia Nigra      | 10  | -20 | -12 | 317  | 2536  | 5.79  |

\* Thresholded and corrected for multiple comparisons (FDR  $p < 0.05$ ,  $k=5$ )

**Supplementary Table 3. Univariate activation during recovery test (CS + > CS-). Related to STAR METHODS QUANTIFICATION AND STATISTICAL ANALYSIS *Univariate Analysis* and Figure S4.**

| Imagined                     | Region                     | MNI Coordinates |     |     | voxels | mm3   | max stat |
|------------------------------|----------------------------|-----------------|-----|-----|--------|-------|----------|
|                              |                            | x               | y   | z   |        |       |          |
| <b>Cortex</b>                |                            |                 |     |     |        |       |          |
| <b><i>Temporal Lobe</i></b>  |                            |                 |     |     |        |       |          |
| R                            | 'Temporal_Inf_R (aal)'     | 46              | -70 | -4  | 284    | 2272  | -5.07    |
| <b><i>Occipital Lobe</i></b> |                            |                 |     |     |        |       |          |
| L                            | 'Calcarine_L (aal)'        | -10             | -98 | -6  | 111    | 888   | -4.69    |
| L                            | 'Cuneus_L (aal)'           | -6              | -86 | 16  | 234    | 1872  | -5.09    |
| L                            | Occipital_Mid'             | -26             | -86 | 34  | 191    | 1528  | -4.8     |
| R                            | Occipital_Mid'             | 32              | -74 | 32  | 151    | 1208  | -4.59    |
| Real                         | Region                     | MNI Coordinates |     |     | voxels | mm3   | max stat |
|                              |                            | x               | y   | z   |        |       |          |
| <b>Cortex</b>                |                            |                 |     |     |        |       |          |
| <b><i>Frontal Lobe</i></b>   |                            |                 |     |     |        |       |          |
| R                            | 'Inferior Frontal Gyrus'   | 48              | 38  | 2   | 43     | 344   | -4.57    |
| R                            | 'Inferior Frontal Gyrus'   | 58              | 8   | 36  | 80     | 640   | -4.59    |
| R                            | 'Middle Frontal Gyrus'     | 24              | 28  | -18 | 108    | 864   | -4.29    |
| R                            | 'Middle Frontal Gyrus'     | 24              | -2  | 48  | 98     | 784   | -4.47    |
| <b><i>Temporal Lobe</i></b>  |                            |                 |     |     |        |       |          |
| L                            | Amygdala                   | -16             | -8  | -32 | 120    | 960   | -5.01    |
| R                            | 'Insula'                   | 46              | 8   | 12  | 50     | 400   | -4.43    |
| R                            | Insula                     | 42              | 4   | 24  | 71     | 568   | -4.73    |
| R                            | 'Fusiform Gyrus'           | 56              | -50 | -24 | 68     | 544   | -4.37    |
| L                            | 'Superior Temporal Gyrus'  | -36             | 0   | -20 | 66     | 528   | -4.32    |
| L                            | 'Superior Temporal Gyrus'  | -54             | -42 | 8   | 76     | 608   | -4.32    |
| R                            | 'Superior Temporal Gyrus'  | 40              | 6   | -22 | 75     | 600   | -4.33    |
| L                            | Hippocampus                | -40             | -22 | -14 | 52     | 416   | -4.41    |
| <b><i>Parietal Lobe</i></b>  |                            |                 |     |     |        |       |          |
| R                            | 'Inferior Parietal Lobule' | 56              | -38 | 24  | 254    | 2032  | -4.85    |
| R                            | 'Parietal_Inf_R (aal)'     | 32              | -46 | 50  | 634    | 5072  | -5.01    |
| L                            | 'Postcentral Gyrus'        | -58             | -24 | 40  | 205    | 1640  | -4.52    |
| <b><i>Occipital Lobe</i></b> |                            |                 |     |     |        |       |          |
| L                            | 'Middle Occipital Gyrus'   | -32             | -82 | 8   | 1349   | 10792 | -6.02    |

|                      |               |                          |          |          |               |            |                 |       |
|----------------------|---------------|--------------------------|----------|----------|---------------|------------|-----------------|-------|
|                      | R             | 'Precuneus'              | 20       | -72      | 28            | 2978       | 23824           | -6.19 |
| <b>Cerebellum</b>    |               |                          |          |          |               |            |                 |       |
|                      | L             | 'Culmen'                 | -44      | -44      | -30           | 294        | 2352            | -5.56 |
|                      | L             | 'Declive'                | -28      | -84      | -24           | 96         | 768             | -5.37 |
| <b>Brainstem</b>     |               |                          |          |          |               |            |                 |       |
|                      | L             | 'Pons'                   | -8       | -12      | -32           | 240        | 1920            | -5.01 |
| <b>None</b>          | <b>Region</b> | <b>MNI Coordinates</b>   |          |          | <b>voxels</b> | <b>mm3</b> | <b>max stat</b> |       |
|                      |               | <b>x</b>                 | <b>y</b> | <b>z</b> |               |            |                 |       |
| <b>Cortex</b>        |               |                          |          |          |               |            |                 |       |
| <b>Frontal Lobe</b>  |               |                          |          |          |               |            |                 |       |
|                      | L             | 'Cingulate Gyrus'        | -6       | -12      | 30            | 60         | 480             | 5.11  |
|                      | R             | 'Middle Frontal Gyrus'   | 32       | 28       | 36            | 50         | 400             | -4.14 |
|                      | L             | 'Inferior Frontal Gyrus' | -30      | 32       | -4            | 117        | 936             | 5.45  |
| <b>Temporal Lobe</b> |               |                          |          |          |               |            |                 |       |
|                      | L             | Amygdala                 | -10      | -8       | -14           | 68         | 544             | 4.21  |
|                      | L             | Hippocampus              | -36      | -28      | -12           | 80         | 640             | 4.62  |
|                      | R             | Insula                   | 46       | 4        | 20            | 77         | 616             | -4.19 |

\* Thresholded uncorrected ( $p < 0.05$ ,  $k = 5$ )

**Supplementary Table 4. There was no effect of order or stimulus counterbalancing on SCR,  
Related to Figure 3 and Figure S4**

*Type III ANOVA with Satterthwaite's method*

| Source      | <i>df</i> | <i>SS</i> | <i>MS</i> | <i>F</i> | <i>P</i> |
|-------------|-----------|-----------|-----------|----------|----------|
| Group       | 2, 60     | 0.003     | 0.002     | 0.325    | 0.724    |
| Order       | 1, 60     | 0.002     | 0.002     | 0.355    | 0.554    |
| Group:Order | 2, 60     | 0.001     | 0.001     | 0.128    | 0.880    |

*Post hoc within group contrasts (all phases): Order A – Order B*

| Group                  | <i>df</i> | <i>Estimate</i> | <i>SE</i> | <i>t.ratio</i> | <i>P</i> |
|------------------------|-----------|-----------------|-----------|----------------|----------|
| Imagined<br>Extinction | 60        | -0.001          | 0.016     | -0.042         | 0.967    |
| Standard<br>Extinction | 60        | 0.010           | 0.014     | 0.735          | 0.465    |
| No Extinction          | 60        | 0.006           | 0.014     | 0.412          | 0.682    |

*Within Acquisition Phase (all groups) ANOVA Contrast: Order A – B*

|           | <i>df</i> | <i>SS</i> | <i>MS</i> | <i>F</i> | <i>P</i> |
|-----------|-----------|-----------|-----------|----------|----------|
| Order     | 1         | 0.004     | 0.004     | 0.256    | 0.614    |
| Residuals | 64        | 0.885     | 0.014     |          |          |

**Supplementary Table 5. Post hoc analyses of the neural network supporting imagined extinction. Related to Figure 4D**

10 out of 12 nodes yielded group significant differences in betweenness centrality in a one-way ANOVA test, FDR corrected for multiple comparisons.

*One-way Analysis of Variance of the Betweenness Centrality of the L NAc Node by Group*

| Source         | df | SS      | MS      | F     | P        | $\eta^2$ |
|----------------|----|---------|---------|-------|----------|----------|
| Between groups | 2  | 18008.8 | 9004.42 | 35.17 | 5.54e-11 | 0.53     |
| Within groups  | 63 | 16131.1 | 256.05  |       |          |          |
| Total          | 65 | 34139.9 |         |       |          |          |

*Significant pair-wise two-sample t-tests with unequal variance:*

None > Imagined  $t(23) = 8.68, P < 0.0001, CI = [30.92, 50.26],$  Hedges  $g = 2.35$   
 None > Real  $t(38.39) = 3.03, P = 0.004, CI = [5.56, 27.97],$  Hedges  $g = -0.86$   
 Real > Imagined  $t(21) = 8.04, P < 0.0001, CI = [17.66, 29.98],$  Hedges  $g = 2.32$

*One-way Analysis of Variance of the Betweenness Centrality of the R NAc Node by Group*

| Source         | df | SS      | MS      | F     | P        | $\eta^2$ |
|----------------|----|---------|---------|-------|----------|----------|
| Between groups | 2  | 12522.6 | 6261.31 | 21.03 | 1.01e-07 | 0.40     |
| Within groups  | 63 | 18757.9 | 297.74  |       |          |          |
| Total          | 65 | 31280.5 |         |       |          |          |

*Significant pair-wise two-sample t-tests with unequal variance:*

Imagined > None  $t(25.42) = 5.79, P < 0.0001, CI = [17.57, 36.93],$  Hedges  $g = 1.58$   
 Imagined > Real  $t(24.17) = 8.13, P < 0.0001, CI = [24.05, 40.40],$  Hedges  $g = 2.36$

*One-way Analysis of Variance of the Betweenness Centrality of the L Amygdala-CM Node by Group*

| Source         | df | SS      | MS      | F     | P        | $\eta^2$ |
|----------------|----|---------|---------|-------|----------|----------|
| Between groups | 2  | 20386.3 | 10193.2 | 58.51 | 4.33e-15 | 0.65     |
| Within groups  | 63 | 10975.5 | 174.2   |       |          |          |
| Total          | 65 | 31361.8 |         |       |          |          |

*Significant pair-wise two-sample t-tests with unequal variance:*

Imagined > Real  $t(25.8) = 13.59, P < 0.0001, CI = [32.08, 43.53],$  Hedges  $g = 3.96$   
 None > Real  $t(40.87) = 8.14, P < 0.0002, CI = [27.69, 45.96],$  Hedges  $g = 2.32$

*One-way Analysis of Variance of the Betweenness Centrality of the R Amygdala-CM Node by Group*

| Source         | df | SS      | MS      | F    | P          | $\eta^2$ |
|----------------|----|---------|---------|------|------------|----------|
| Between groups | 2  | 492.1   | 246.038 | 1.59 | 0.211 n.s. | 0.04     |
| Within groups  | 63 | 9725.2  | 154.368 |      |            |          |
| Total          | 65 | 10217.3 |         |      |            |          |

\* ANOVA not significant; pair-wise t-tests not reported



*One-way Analysis of Variance of the Betweenness Centrality of the L Amygdala-LB Node by Group*

| Source         | df | SS      | MS     | F    | P          | $\eta^2$ |
|----------------|----|---------|--------|------|------------|----------|
| Between groups | 2  | 225.12  | 112.56 | 3.49 | 0.039 n.s. | 0.10     |
| Within groups  | 63 | 2031.91 | 32.25  |      |            |          |
| Total          | 65 | 2257.03 |        |      |            |          |

\* ANOVA not significant; pair-wise t-tests not reported

*One-way Analysis of Variance of the Betweenness Centrality of the R Amygdala-LB Node by Group*

| Source         | df | SS       | MS      | F    | P        | $\eta^2$ |
|----------------|----|----------|---------|------|----------|----------|
| Between groups | 2  | 5558     | 2779.00 | 17.6 | 8.44e-07 | 0.36     |
| Within groups  | 63 | 9945.03  | 157.858 |      |          |          |
| Total          | 65 | 15503.03 |         |      |          |          |

*Significant pair-wise two-sample t-tests with unequal variance:*

Real > Imagined  $t(39.42) = 4.21, P = 0.0001, CI = [9.26, 26.34], Hedges g = 1.26$   
 Real > None  $t(35.89) = 5.38, P < 0.0001, CI = [12.83, 28.34], Hedges g = 1.59$

*One-way Analysis of Variance of the Betweenness Centrality of the L Auditory (Te1.0) Node by Group*

| Source         | df | SS      | MS      | F      | P        | $\eta^2$ |
|----------------|----|---------|---------|--------|----------|----------|
| Between groups | 2  | 6524.12 | 3262.06 | 761.66 | 7.36e-45 | 0.96     |
| Within groups  | 63 | 269.82  | 4.28    |        |          |          |
| Total          | 65 | 6793.94 |         |        |          |          |

*Significant pair-wise two-sample t-tests with unequal variance:*

Real > Imagined  $t(21) = 27.60, P < 0.0001, CI = [19.50, 22.68], Hedges g = 7.97$   
 Real > None  $t(21) = 27.59, P < 0.0001, CI = [19.50, 22.68], Hedges g = 8.37$

*One-way Analysis of Variance of the Betweenness Centrality of the R Auditory (Te1.0) Node by Group*

| Source         | df | SS      | MS      | F        | P         | $\eta^2$ |
|----------------|----|---------|---------|----------|-----------|----------|
| Between groups | 2  | 5551.62 | 2775.81 | 45619.84 | 2.65e-100 | 1.00     |
| Within groups  | 63 | 3.83    | 0.06    |          |           |          |
| Total          | 65 | 5555.45 |         |          |           |          |

*Significant pair-wise two-sample t-tests with unequal variance:*

Imagined > Real  $t(23) = Inf, P < 0.0001, CI = [20,20], Hedges g = Inf$   
 Imagined > None  $t(23) = 239.00, P < 0.0001, CI = [19.74, 20.01], Hedges g = 64.74$

*One-way Analysis of Variance of the Betweenness Centrality of the L CA1 Node by Group*

| Source         | df | SS      | MS      | F      | P        | $\eta^2$ |
|----------------|----|---------|---------|--------|----------|----------|
| Between groups | 2  | 31964.4 | 15982.2 | 251.05 | 9.71e-31 | 0.89     |
| Within groups  | 63 | 4010.6  | 63.7    |        |          |          |

Total 65 35975

*Significant pair-wise two-sample t-tests with unequal variance:*

Real > Imagined  $t(21.84) = 15.73, P < 0.0001, CI = [40.28, 52.52], Hedges g = 4.55$   
 Real > None  $t(21.03) = 16.06, P < 0.0001, CI = [40.84, 52.99], Hedges g = 4.87$

*One-way Analysis of Variance of the Betweenness Centrality of the R CA1 Node by Group*

| Source         | df | SS      | MS      | F     | P        | $\eta^2$ |
|----------------|----|---------|---------|-------|----------|----------|
| Between groups | 2  | 2978.95 | 1489.48 | 78.75 | 7.27e-18 | 0.71     |
| Within groups  | 63 | 1191.53 | 18.91   |       |          |          |
| Total          | 65 | 4170.48 |         |       |          |          |

*Significant pair-wise two-sample t-tests with unequal variance:*

None > Real  $t(23) = 11.48, P < 0.0001, CI = [12.01, 17.31], Hedges g = 3.18$   
 Imagined > Real  $t(19) = 15.68, P < 0.0001, CI = [11.87, 15.53], Hedges g = 4.99$

*One-way Analysis of Variance of the Betweenness Centrality of the PAG Node by Group*

| Source         | df | SS      | MS      | F     | P        | $\eta^2$ |
|----------------|----|---------|---------|-------|----------|----------|
| Between groups | 2  | 3931.62 | 1965.81 | 46.95 | 3.29e-13 | 0.60     |
| Within groups  | 63 | 2637.65 | 41.87   |       |          |          |
| Total          | 65 | 6569.27 |         |       |          |          |

*Significant pair-wise two-sample t-tests with unequal variance:*

None > Imagined  $t(29.74) = 2.84, P = 0.008, CI = [1.80, 11.04], Hedges g = 0.88$   
 None > Real  $t(44) = 12.26, P < 0.0001, CI = [15.31, 21.34], Hedges g = 3.54$   
 Imagined > Real  $t(28.77) = 5.32, p < 0.0001, CI = [7.33, 16.49], Hedges g = 1.65$

*One-way Analysis of Variance of the Betweenness Centrality of the vmPFC Node by Group*

| Source         | df | SS      | MS      | F     | P        | $\eta^2$ |
|----------------|----|---------|---------|-------|----------|----------|
| Between groups | 2  | 19691.5 | 9845.73 | 30.79 | 4.72e-10 | 0.49     |
| Within groups  | 63 | 20148.3 | 319.81  |       |          |          |
| Total          | 65 | 39839.8 |         |       |          |          |

*Significant pair-wise two-sample t-tests with unequal variance:*

Imagined > Real  $t(25.48) = 4.33, P = 0.0002, CI = [11.05, 31.04], Hedges g = 1.26$   
 Imagined > None  $t(29) = 9.63, P < 0.0001, CI = [33.41, 51.42], Hedges g = 2.66$   
 Real > None  $t(42.96) = 3.45, P = 0.001, CI = [8.88, 33.87], Hedges g = 1.00$

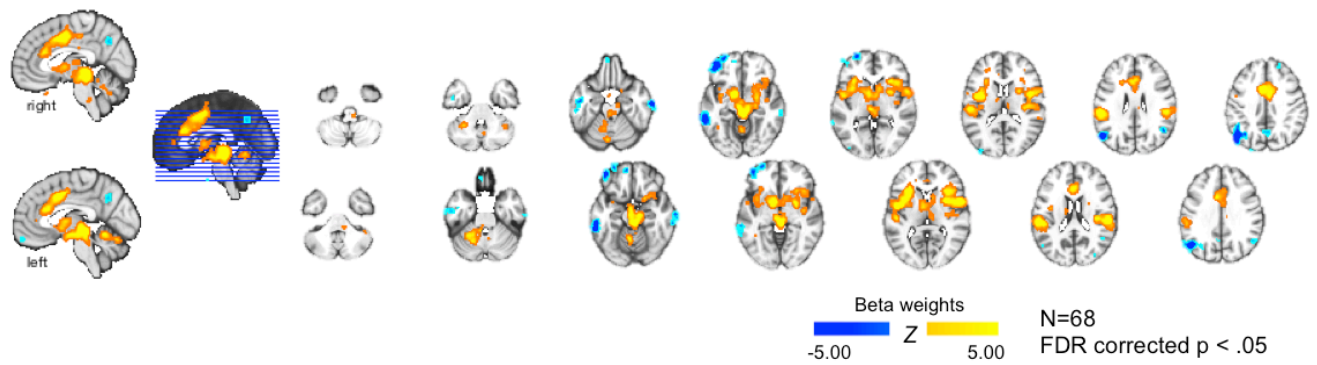

**Supplementary Figure 1. Univariate activation during threat Acquisition (CS+ > CS-), Related to Figure 2.** This is the FDR corrected contrast map (CS+ > CS-) resulting from a univariate general linear model applied to all subjects (n = 68) during the Threat Acquisition phase. This map is similar to the multivariate Neural Threat-Predictive Pattern in the main text. Regions with positive activations include the dACC, PAG, amygdala and insula. Regions with negative activations include the precuneus and orbitofrontal cortex. See Table S2 for a detailed list of regions.

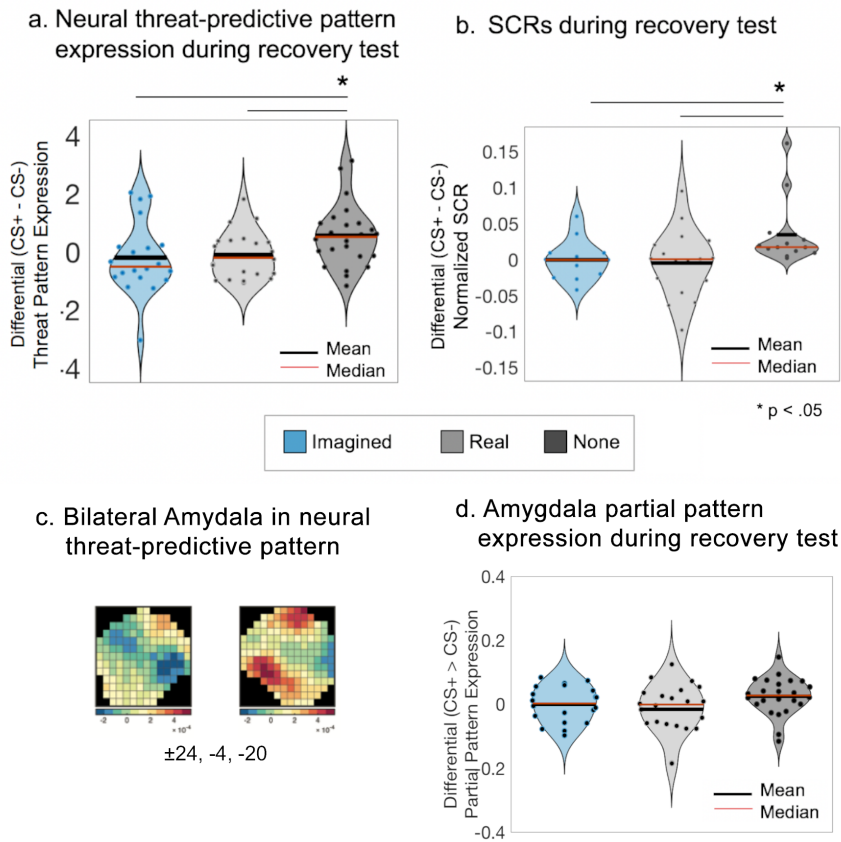

**Supplementary Figure 2. Imagined and real extinction reduce neural and physiological threat expression, Related to Figures 2 and 3. A-B.** Violin plot version of Figure 3 panels A and B in the main text. See Figure 3 in main text for details. **C.** The unthresholded classification weights in the amygdala extracted from the whole brain threat predictive pattern in Figure 2 of the main text. The neural threat-predictive pattern was masked with a bilateral anatomical mask of the amygdala and then applied to the threat recovery test phase (late re-extinction) in order to determine if threat expression was altered in this region of interest. **D.** The partial threat pattern expression of the amygdala was assessed in the three groups (analogous to Figure 3A). Group differences were not significant, but there is a trend consistent with the findings in this paper: The no extinction group increased threat expression in the amygdala during the recovery test but the imagined and real extinction groups did not ( $F(2,63) = 2.35, p = 0.11, \eta^2 = 0.07$ ). The no extinction group ( $\bar{x} = 0.02, n = 24$ ) is greater than real ( $\bar{x} = -0.02, n = 22; t(38.68) = 2.00, p = 0.05, \text{Hedges } g = 0.59$ ), and is non-significantly greater than imagined ( $\bar{x} = -0.0005, n = 20, t(41.04) = 1.46, p = 0.15, \text{Hedges } g = 0.43$ ). No difference was found between the imagined and real ( $t(38.10) = 0.75, p = 0.46, \text{Hedges } g = 0.22$ ) extinction groups.

a. Imagined Extinction

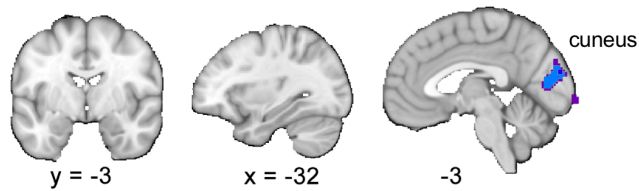

b. Real Extinction

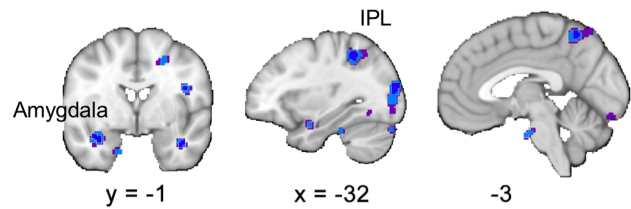

c. No Extinction

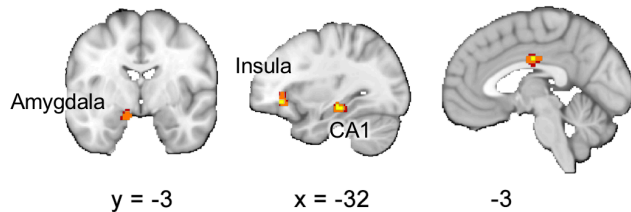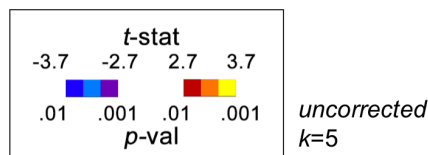

d. Comparison of average signal in a priori ROIs

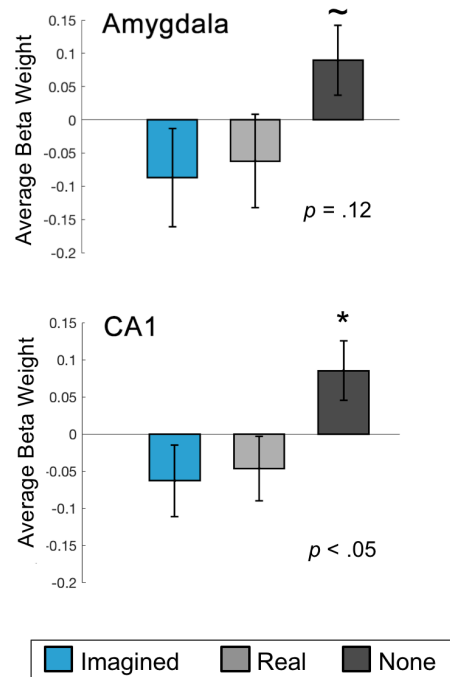

**Supplementary Figure 3. Univariate Activation during Recovery Test (CS + > CS-), Related to Figure 3.** A general linear model contrasting activation to the last 5 trials of re-extinction CS+ > CS- was applied across the whole brain within each group. Uncorrected t-statistics are plotted for each map ( $P < 0.05$ , cluster size  $k = 5$ ; see Table S3 for complete list of activations). **A. Imagined Extinction.** Amongst the significant clusters was the cuneus, which was negatively activated to the CS+ relative to CS-. This map demonstrates no evidence for threat recovery in the Imagined Extinction group. **B. Real Extinction.** Activations were distributed and largely negative. Notably, there were decreased responses to the CS+ relative to the CS- in the amygdala and the Inferior Parietal Lobule (IPL). **C. No Extinction.** The no extinction group demonstrated distributed positive activations, that is, greater responding to the threatening relative to the safety stimulus, in several regions known to be involved in threat expression, including the amygdala, anterior insula, hippocampus (CA1), and cingulate cortex. **D. Comparison of average signal in a priori ROIs.**

Unthresholded beta-weights in bilateral a priori ROIs, the amygdala and CA1, were extracted and averaged from the maps in A-C and then compared across groups. A one-way ANOVA revealed a non-significant trend of group effects in the amygdala ( $F(2,63) = 2.23$ ,  $p = 0.12$ ,  $\eta^2 = 0.07$ ). Pairwise differences, revealed by two-sample  $t$ -tests, were not significant, but demonstrate a trend that activation in the amygdala is greater in the no extinction group ( $\bar{x} = 0.09$ ,  $n = 24$ ) than in the imagined ( $t(35.64) = 1.95$ ,  $p = 0.06$ ,  $CI = [0.36, -0.01]$ , Hedges  $g = 0.59$ ) or real extinction groups ( $t(39.77) = 1.734$ ,  $p = 0.09$ ,  $CI = [0.33, -0.03]$ , Hedges  $g = 0.51$ ). There was no difference between the imagined ( $\bar{x} = -0.09$ ,  $n = 20$ ) and real extinction ( $\bar{x} = -0.06$ ,  $n = 22$ ) groups ( $t(39.61) = -0.25$ ,  $p = 0.81$ ,  $CI = [-0.23, 0.18]$ , Hedges  $g = -0.07$ ). A one-way ANOVA revealed group effects in the CA1 ( $F(2,63) = 3.61$ ,  $p = 0.03$ ,  $\eta^2 = 0.10$ ). Pairwise  $t$ -tests revealed that activation in CA1 is greater in the no extinction group ( $\bar{x} = 0.09$ ) than in the imagined ( $t(38.86) = -2.38$ ,  $p = 0.02$ ,  $CI = [-0.27, -0.02]$ , Hedges  $g = -0.71$ ) or real extinction groups ( $t(43.20) = -2.24$ ,  $p = 0.03$ ,  $CI = [-0.25, -0.01]$ , Hedges  $g = -0.65$ ). There was no difference between the imagined ( $\bar{x} = -0.06$ ) and real extinction ( $\bar{x} = -0.04$ ) groups ( $t(39.13) = -0.25$ ,  $p = 0.80$ ,  $CI = [-0.15, 0.11]$ , Hedges  $g = -0.08$ ).

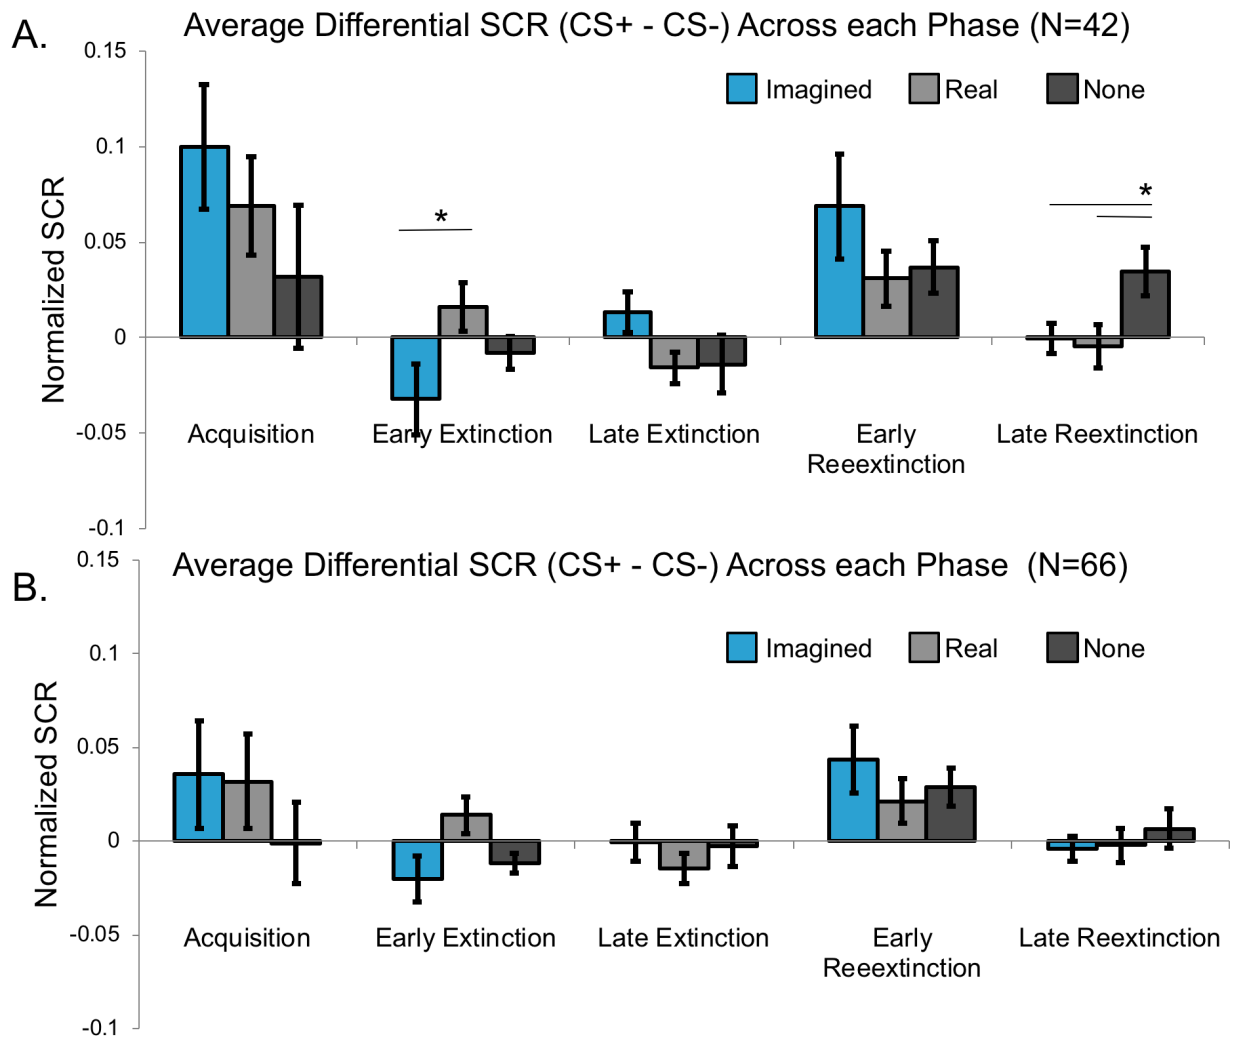

**Supplementary Figure 4. Average skin conductance responses across all phases, Related to Figure 3.** *A. Average Differential SCR Across Each Phase.* A linear mixed effects model including group and phase as predictors, indicated a significant effect of phase across the entire experiment ( $F(4,156) = 9.19, P = 1.08e-06$ ). There was a trend towards a significant group by phase interaction ( $F(8,156) = 1.78, P = 0.08$ ). The planned group comparison of threat-related SCRs during late re-extinction was significant and included in the main text. Post hoc analysis of group differences during early and late extinction phases revealed a significant group by phase interaction ( $F(2,39) = 5.01, P = 0.01$ ) and a significant pairwise difference between imagined and real extinction groups during early extinction ( $t(77.96) = -2.770, P = 0.02$ ; P value adjustment via tukey method for comparing a family of 3 estimates) Participants who did not demonstrate greater SCRs to the CS+ relative to the CS- on average across all acquisition trials ( $n = 24$ ) were removed from analysis because it would be

meaningless to investigate threat recovery in the signal of participants who did not demonstrate initial learning. *B. Average Differential SCR Across Each Phase for All Subjects (n = 66)*. When participants who did not show a discriminatory SCR are not removed from the analysis, effects are diminished, but the trend remains. Additionally, this plot shows why it was necessary to remove participants who did not demonstrate a discriminatory SCR during learning; if there is no acquisition baseline it is difficult to assess the importance of recovery during late re-extinction.



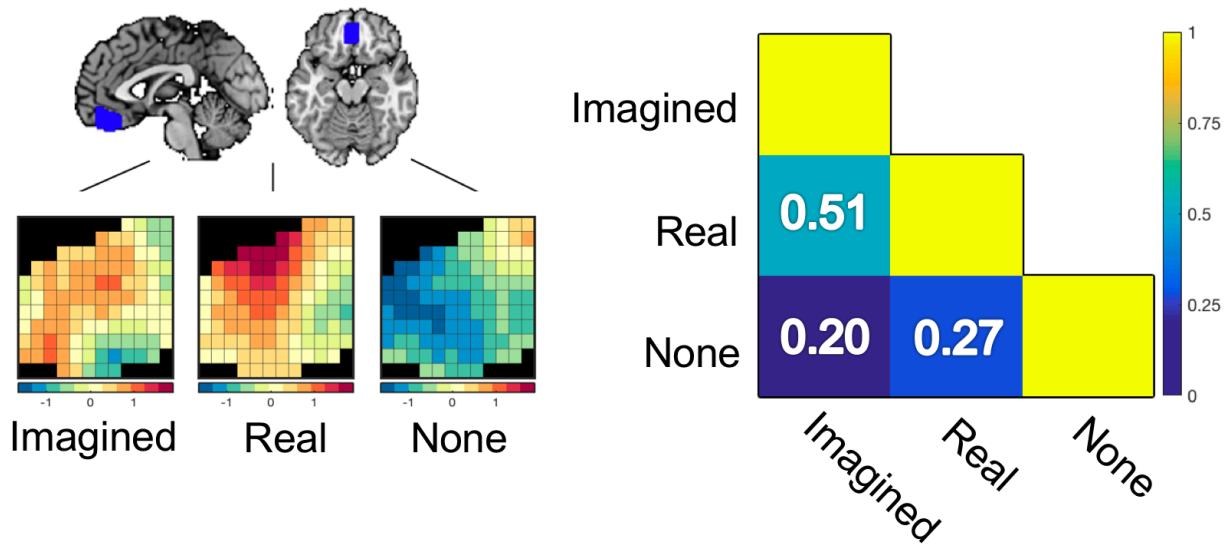

**Supplementary Figure 5. Imagined and real extinction yield similar patterns in the vmPFC during extinction, Related to Figure 5.** To assess the similarity of the representational content in the vmPFC across ‘extinction’ sessions, voxel-wise activations were tested for correlations between groups during extinction (the third time bin; Figure 4B). The third time bin was selected *post hoc*, based on the average temporal activation data in order to focus on the peak activation during extinction. Imagined and real extinction had the highest correlation coefficient ( $R = 0.51$ ,  $P = 0.25$ ). Imagined and no extinction were weakly positively correlated ( $R = 0.20$ ,  $P = 0.76$ ) and real and no extinction were also weakly positively correlated ( $R = 0.27$ ,  $P = 0.66$ ). These correlations were not significant according to a nonparametric bootstrap test (10,000 samples). These results suggest that activations in the vmPFC are spatially analogous in imagined and real extinction, but require further data.

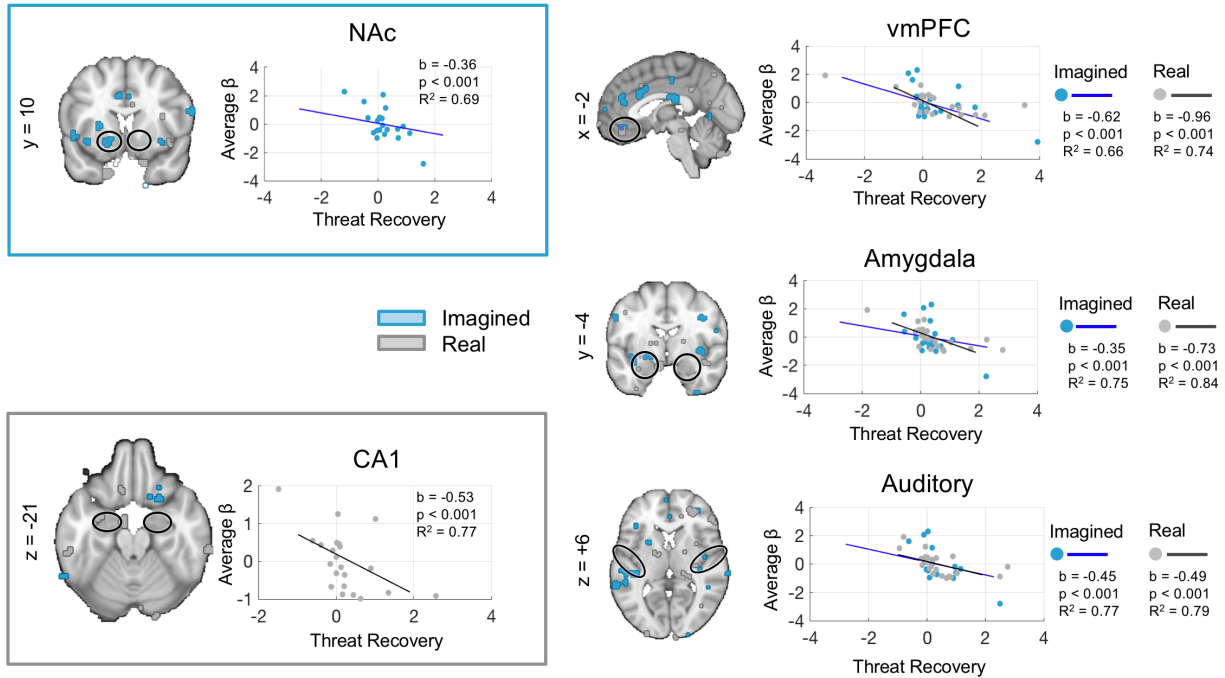

**Supplementary Figure 6. Distribution of data supporting the effects in ROIs that predict the success of imagined and real extinction, Related to Figure 6.** Scatterplots are shown for descriptive purposes. These plots illustrate the distribution of individual data values in Figure 6, but should not be taken as indicative of the true effect sizes (Reddan, Lindquist, & Wager, 2017).
